# Supplementary material
Source: PubMed Central journal article supplement (PMC2893804)
Supplement: ddq172_1.pdf [file ddq172_1.pdf]

## SUPPLEMENTARY MATERIAL

**Supplementary Table 1. Minor allele frequency comparisons for controls versus each CAD-affected case group for all *TNFR1* SNPs**

| SNP name <sup>a</sup>   | Chromosome 12 location (bp) | Alleles <sup>c</sup> | Older Normal (CATHGEN) | All Affected (CATHGEN) |                             | Younger Affected (CATHGEN) |                             | Older Affected (CATHGEN) |                             | GENECARD Probands |                             |
|-------------------------|-----------------------------|----------------------|------------------------|------------------------|-----------------------------|----------------------------|-----------------------------|--------------------------|-----------------------------|-------------------|-----------------------------|
|                         |                             |                      | MAF <sup>d</sup> (%)   | MAF (%)                | <i>p</i> value <sup>†</sup> | MAF (%)                    | <i>p</i> value <sup>‡</sup> | MAF (%)                  | <i>p</i> value <sup>‡</sup> | MAF (%)           | <i>p</i> value <sup>‡</sup> |
| rs36037566              | 6,307,433                   | <b>D/I</b>           | 47.7                   | 50.9                   | 0.476                       | 52.8 <sup>‡</sup>          | 0.743                       | 46.9                     | 0.698                       | 46.8              | 0.871                       |
| rs12426675 <sup>b</sup> | 6,309,731                   | <b>A/G</b>           | 16.9                   | 20.0                   | 0.171                       | 17.8                       | 0.836                       | 24.6                     | 0.004                       | 21.7              | 0.025                       |
| rs1800693 <sup>b</sup>  | 6,310,270                   | <b>C/T</b>           | 41.3                   | 42.8                   | 0.638                       | 44.9                       | 0.350                       | 38.7                     | 0.752                       | 40.7              | 0.797                       |
| rs4149586               | 6,312,121                   | <b>C/A</b>           | 2.1                    | 1.7                    | 0.275                       | 1.4                        | 0.149                       | 2.2                      | 0.542                       | 1.2               | 0.065                       |
| rs1800692 <sup>b</sup>  | 6,312,607                   | <b>G/A</b>           | 41.6                   | 38.6                   | 0.872                       | 38.9                       | 0.538                       | 38.1                     | 0.812                       | 39.2              | 0.559                       |
| rs4149584 <sup>b</sup>  | 6,312,904                   | <b>C/T</b>           | 1.6                    | 1.7                    | 0.137                       | 1.7                        | 0.125                       | 1.5                      | 0.363                       | 2.0               | 0.356                       |
| rs4149579               | 6,317,618                   | <b>C/T</b>           | 10.0                   | 8.0                    | 0.094                       | 8.0                        | 0.367                       | 7.9                      | 0.119                       | 7.5               | 0.175                       |
| rs4149578               | 6,317,698                   | <b>C/T</b>           | 6.9                    | 8.3                    | 0.093                       | 6.5                        | 0.757                       | 12.0                     | 0.001                       | 9.5               | 0.037                       |
| rs4149577               | 6,317,783                   | <b>A/G</b>           | 48.6                   | 46.0                   | 0.869                       | 46.0                       | 0.718                       | 45.9                     | 0.974                       | 47.7              | 0.802                       |
| rs4149576               | 6,319,376                   | <b>C/T</b>           | 42.1                   | 44.3                   | 0.385                       | 46.2                       | 0.355                       | 40.6                     | 0.848                       | 41.3              | 0.908                       |
| rs4149573               | 6,319,645                   | <b>C/G</b>           | 5.7                    | 7.3                    | 0.083                       | 5.8                        | 0.814                       | 10.5                     | 0.002                       | 9.1               | 0.018                       |
| rs767455 <sup>b</sup>   | 6,321,206                   | <b>T/C</b>           | 42.8                   | 45.3                   | 0.427                       | 46.9                       | 0.391                       | 42.0                     | 0.795                       | 41.9              | 0.824                       |
| rs2234649 <sup>b</sup>  | 6,321,624                   | <b>T/G</b>           | 1.0                    | 1.1                    | 0.873                       | 0.8                        | 0.752                       | 1.8                      | 0.429                       | 0.8               | 0.872                       |
| rs4149621 <sup>b</sup>  | 6,321,822                   | <b>T/C</b>           | 2.1                    | 1.7                    | 0.763                       | 1.5                        | 0.365                       | 2.2                      | 0.875                       | 1.4               | 0.712                       |
| rs4149570 <sup>b</sup>  | 6,321,851                   | <b>C/A</b>           | 41.6                   | 39.4                   | 0.967                       | 39.1                       | 0.802                       | 40.1                     | 0.881                       | 39.2              | 0.378                       |
| rs11064145              | 6,325,359                   | <b>T/G</b>           | 46.0                   | 47.3                   | 0.152                       | 48.5                       | 0.310                       | 44.8                     | 0.078                       | 44.1              | 0.801                       |

<sup>a</sup>For SNP location, please see Supplementary Figure 1. <sup>b</sup>These SNPs were included in the study of Poirier et al.<sup>11</sup> (see Supplementary Table 3).

<sup>c</sup>Major allele is bold, D=deletion, I=insertion; basepair position determined using NCBI build 36. <sup>d</sup>MAF = minor allele frequency.

<sup>†</sup>The *p* value is for the comparison of Caucasian cases and controls using logistic regression adjusting for gender and CAD risk factors. *P* values are not adjusted for multiple comparisons; however, a *p* value of < 0.0031 would be significant after Bonferroni correction for 16 comparisons.

<sup>‡</sup>The minor allele in the controls is the major allele in the younger affected sample.

## SUPPLEMENTARY MATERIAL

**Supplementary Table 2. Family-based association tests for *TNFR1* SNPs and CAD in 1101 GENECARD families**

| SNP Name         | APL <sup>a</sup> <i>p</i> value | PDT <sup>b</sup>     |                             |
|------------------|---------------------------------|----------------------|-----------------------------|
|                  |                                 | chi-square statistic | <i>p</i> value <sup>c</sup> |
| rs36037566       | 0.7154                          | 1.81                 | 0.1789                      |
| rs12426675       | 0.8300                          | 1.34                 | 0.2468                      |
| rs1800693        | 0.0900                          | 3.65                 | 0.0561                      |
| rs4149586        | 0.5247                          | 0.33                 | 0.5637                      |
| rs1800692        | 0.2623                          | 1.76                 | 0.1845                      |
| rs4149584 (R92Q) | 0.6081                          | 4.26                 | 0.0389                      |
| rs4149579        | 0.1749                          | 1.31                 | 0.2526                      |
| rs4149578        | 0.1040                          | 0.63                 | 0.4281                      |
| rs4149577        | 0.4672                          | 2.96                 | 0.0852                      |
| rs4149576        | 0.0846                          | 4.04                 | 0.0445                      |
| rs4149573        | 0.7681                          | 1.23                 | 0.2674                      |
| rs767455         | 0.0845                          | 3.45                 | 0.0634                      |
| rs2234649        | 0.2427                          | 0.06                 | 0.8084                      |
| rs4149621        | 0.9945                          | 0.31                 | 0.5791                      |
| rs4149570        | 0.3364                          | 1.42                 | 0.2330                      |
| rs11064145       | 0.2458                          | 4.13                 | 0.0421                      |

<sup>a</sup>APL, association in the presence of linkage. <sup>b</sup>PDT, pedigree disequilibrium test. <sup>c</sup>The *p* values were not adjusted for multiple comparisons; however, a *p* value of < 0.0031 would be significant after Bonferroni correction for 16 comparisons.

## SUPPLEMENTARY MATERIAL

**Supplementary Table 3. Description of novel polymorphisms in *TNFRSF1A* from Poirier *et al.*<sup>11</sup>**

| Polymorphism                              | Position   | Alleles <sup>a</sup> | Chromosome 12 location (bp) | Known SNP <sup>b</sup>  |
|-------------------------------------------|------------|----------------------|-----------------------------|-------------------------|
| G-609T                                    | 5' of gene | <b>G</b> /T          | 6,321,851                   | rs4149570               |
| G-580A                                    | 5' of gene | <b>G</b> /A          | 6,321,822                   | rs4149621               |
| A-383C                                    | 5' of gene | <b>A</b> /C          | 6,321,624                   | rs2234649               |
| P12P                                      | Exon 1     | <b>A</b> /G          | 6,321,206                   | rs767455                |
| G+212/in2 (212th nucleotide of intron 2)  | Intron 2   | <b>G</b> /A          | 6,313,305                   | TNFRSF1A12 <sup>†</sup> |
| R92Q                                      | Exon 4     | <b>G</b> /A          | 6,312,904                   | rs4149584               |
| G+147/in4 (147th nucleotide of intron 4)  | Intron 4   | <b>G</b> /A          | 6,312,646                   | TNFRSF1A14 <sup>†</sup> |
| C+186/in4T (186th nucleotide of intron 4) | Intron 4   | <b>C</b> /T          | 6,312,607                   | rs1800692               |
| G+10/in6A (10th nucleotide of intron 6)   | Intron 6   | <b>G</b> /A          | 6,310,270                   | rs1800693               |
| T+294/in7C (294th nucleotide of intron 7) | Intron 7   | <b>T</b> /C          | 6,309,731                   | rs12426675              |

<sup>a</sup>Major allele is in bold typeface. <sup>b</sup>For minor allele frequencies of these SNPs in the current study, please see Supplementary Table 1.

<sup>†</sup>Monomorphic in our sample; basepair position determined using NCBI build 36

Zhang, *et al.*, Aging-related Atherosclerosis is Exacerbated by Arterial Expression of Tumor Necrosis Factor Receptor-1: Evidence from Mouse Models and Human Association Studies

**SUPPLEMENTARY MATERIAL**

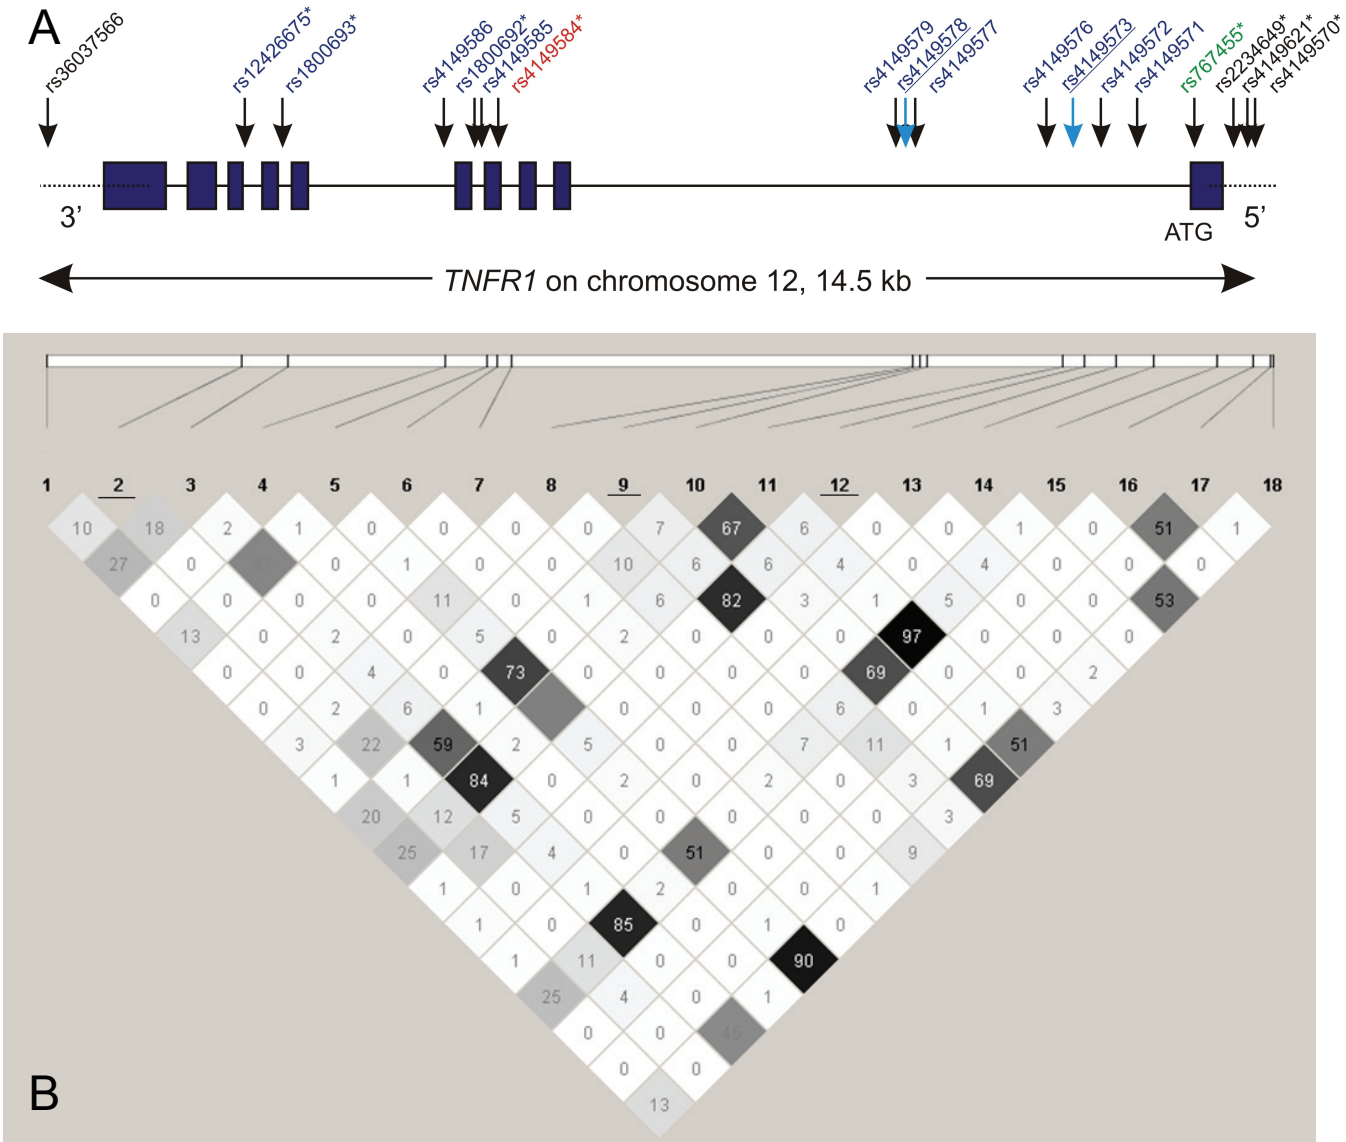

**Supplementary Figure 1.** Location and linkage disequilibrium plot for the *TNFR1* SNPs genotyped in CATHGEN. **(A)** The human *TNFR1* gene (chromosome 12) is depicted with lavender rectangles signifying exons, solid lines signifying introns, dotted lines signifying non-coding regions, and arrows indicating the 16 SNPs genotyped in the CATHGEN cohort. SNPs are color-coded to represent functional status: red, non-synonymous coding; green, synonymous coding; blue, intronic; black, flanking region. The 2 SNPs significantly associated with CAD are rs4149578 (designated by blue arrows), with the following *p* values: *rs4149578*, 0.001; *rs4149573*, 0.002. Asterisks denote *TNFR1* SNPs evaluated by Poirier *et al* (11). The full results for all SNPs are shown in Supplemental Table 2. **(B)** Pair-wise linkage disequilibrium (LD) plot for all SNPs in *TNFR1*. Shading indicates the level of LD, with darker shading representing higher LD. As expected in light of the procedure for SNP selection, LD is limited. Numbers in the boxes represent *r*<sup>2</sup> (×100) values for all Caucasians. The LD pattern is similar for ethnicities and controls (data not shown).

## SUPPLEMENTARY MATERIAL

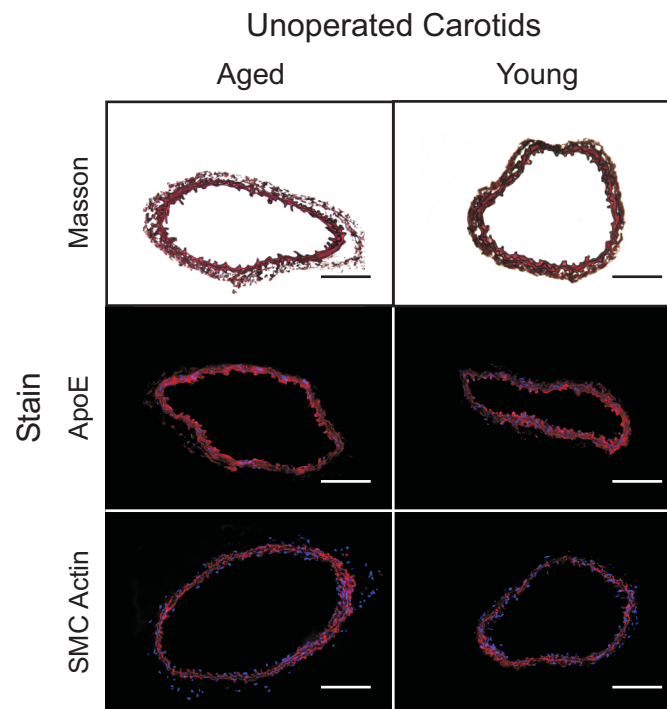

**Supplementary Figure 2.** Young and aged carotid arteries are indistinguishable prior to grafting. Common carotid arteries from aged and young mice were harvested and processed either for paraffin embedding and morphometry (top panels) or OCT embedding and immunofluorescence (lower 4 panels). Specimens were stained with either a modified connective tissue stain ("Masson") or with IgG reactive with apolipoprotein E (apoE) or SMC actin, as indicated. Cognate sections stained with negative control IgG yielded no immunofluorescence. Shown are individual samples representative of 5 independent carotid arteries in each age group. Scale bars = 100  $\mu$ m.

## SUPPLEMENTARY MATERIAL

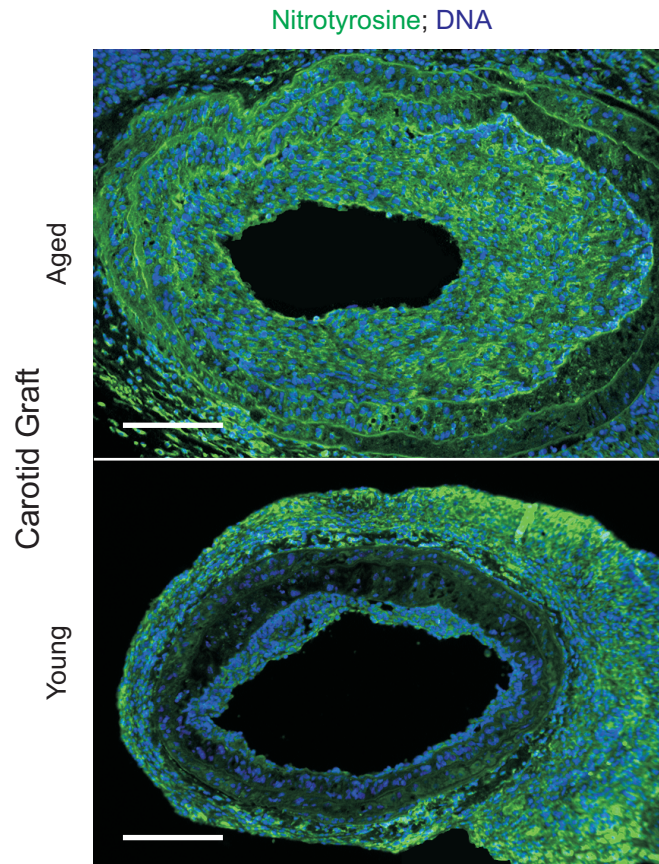

**Supplementary Figure 3.** Aged arteries demonstrate greater atherosclerosis-associated oxidative damage than young arteries. Carotid grafts from Figure 5 were immunostained for nitrotyrosine (green) and counterstained for DNA (blue). Shown are samples representative of four arteries analyzed, with similar results. Scale bars = 100  $\mu$ m.

## SUPPLEMENTARY MATERIAL

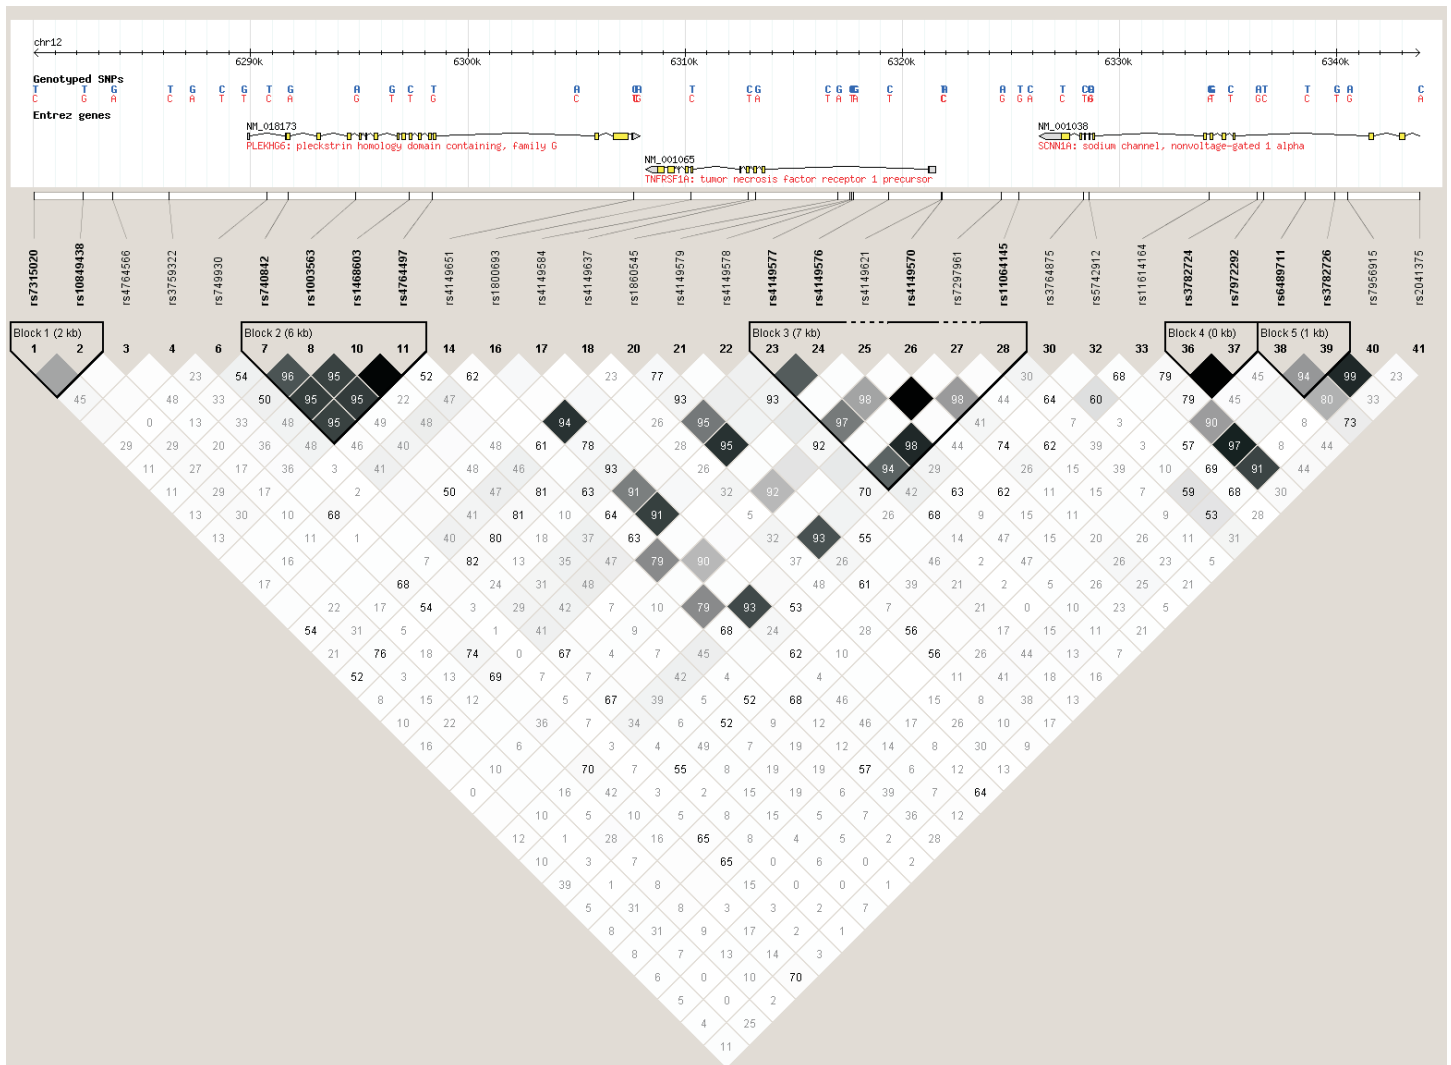

**Supplementary Figure 4.** LD ( $r^2$ ) for the 65kb region surrounding *TNFR1*, generated from the International HapMap Project (<http://hapmap.ncbi.nlm.nih.gov/>) and displayed using the HaploView software (<http://www.broadinstitute.org/mpg/haploview>).
